# Supplementary material for: Genome-Wide Characterization of Chrysanthemum indicum Nuclear Factor Y, Subunit C Gene Family Reveals the Roles of CiNF-YCs in Flowering Regulation
Source: MDPI journal article supplement (doi:10.3390/ijms232112812), 2022-10-24
Supplement: s1 [file s1]

**Supplementary Table S1. Primers used for gene isolation, vector construction and RT-qPCR analysis**

| Accession No.                                                          | Primer set                 |                           |
|------------------------------------------------------------------------|----------------------------|---------------------------|
|                                                                        | Forward primer (5'-3')     | Reverse primer (5' -3')   |
| <b>For gene isolation</b>                                              |                            |                           |
| <i>CiNF-YC1</i> -Full                                                  | TACACCCCACTTCACCTTATC      | CTGATTACACTATGTATAGCAACTC |
| <i>CiNF-YC2</i> -Full                                                  | AGTTGTATAAACATAACCCAGAACC  | GAACCAGGACTTAACATGAGATATC |
| <i>CiNF-YC3</i> -Full                                                  | TTTGAGGTACAGCATTTTCACCC    | CGAGTAGACTCGAGGCTTTAGC    |
| <i>CiNF-YC4</i> -Full                                                  | ACAGATACTTTTTTTTCTTCTAGGG  | CGTCGTATAACATCATTGAGCATAC |
| <i>CiNF-YC5</i> -Full                                                  | AGTTTGTTTATGTCTCATCATGTTG  | TAGTTAATTATTCAACCAACATTCC |
| <b>For vector construction of overexpression in <i>Arabidopsis</i></b> |                            |                           |
| <i>CiNF-YC1</i> -OX                                                    | ACCAAATCGACTCTAGTCTAGA     | GTCTTTGTAGTCCATGGTACC     |
|                                                                        | ATGGACAACAACACAACACCAA     | CCCCTGGCCATCGATACC        |
| <i>CiNF-YC3</i> -OX                                                    | ACCAAATCGACTCTAGTCTAGA     | GTCTTTGTAGTCCATGGTACC     |
|                                                                        | ATGGATCAGGAAGGGCATG        | AGCATCTTCTGTGGTTCTTTTGT   |
| vector-Super1300                                                       | GCCATTTTCGCCTTTTCAG        | CGGTCTTGCGATGATTATCA      |
| <b>For RT-qPCR analysis</b>                                            |                            |                           |
| <i>CiNF-YC1</i>                                                        | CCCACGGGAATGTATGGTCC       | GCCACTCCCAAATGACCCAT      |
| <i>CiNF-YC2</i>                                                        | ACATGGCACCTCAGCATTCA       | ATATATGGCGGAGGCTGCTG      |
| <i>CiNF-YC3</i>                                                        | GCTGTTGGTAGCTCTGCTCA       | GTTGTGCTGGTGGAGACGTA      |
| <i>CiNF-YC4</i>                                                        | GGCAGTCACAGAACATGGGA       | GAAGGAAGACCCACCGACTG      |
| <i>CiNF-YC5</i>                                                        | TCAGGAGGAGGGATATCGGG       | ACACAAGTGGTGCCTCTCCT      |
| <i>CiActin</i>                                                         | TCCGTTGCCCTGAGGTTCT        | GATTTCCCTTGCTCATCCTGTCA   |
| <i>AtLEAFY</i>                                                         | CAACGGAGGTAGTGGTTTGG       | GCTAATACCGCCAATAAAGC      |
| <i>AtGI</i>                                                            | TGCATCTGGTGTAAGGCTACC      | CCTATAGCCCGCAAGAAGTG      |
| <i>AtCO</i>                                                            | GCCTACTTGTGCATGAGCTG       | GTTTATGGCGGGAAGCAAC       |
| <i>AtSOC1</i>                                                          | AACAACCTCGAAGCTTCTAAACGTAA | CCTCGATTGAGCATGTTCCCT     |
| <i>AtFT</i>                                                            | CTGGAACAACCTTTGGTGAG       | TACACTGTTTGCCTGCCAAG      |

|                  |                                |                               |
|------------------|--------------------------------|-------------------------------|
| <i>AtFLC</i>     | GGCTAGCCAGATGGAGAATAATCA       | CCGCCGATTTAAGGTGGCTA          |
| <i>AtSPL3</i>    | CTTAGCTGGACACAACGAGAGAAGGC     | GAGAAACAGACAGAGACACAGAGGA     |
| <i>AtSPL4</i>    | TCAAGGGTAGAGATGACACTTCCTATGC   | TCTCTCATCATAGCAAGTGATGGACCCTG |
| <i>AtSPL5</i>    | CCAGACTCAAGAAAGAAACAGGGTAGACAG | TCCGTGTAGGATTTAATACCATGACC    |
| <i>AtSVP</i>     | GCAACTAACGGAAGAGAACGAG         | GAGCTCTCGGAGTCAACAGG          |
| <i>AtGA20ox1</i> | AGATTACTTCTGCGATGCGTTGG        | TCTTGATACACCTTCCCAAATGGC      |
| <i>AtGA20ox2</i> | CAAGAGTTCGAGCAGTTTGGGAAG       | TCGGAAATAGTCTCGGTTTACGC       |
| <i>AtGA20ox3</i> | ACATAGGCGACACCTTCATGGC         | TCCTTTCTCTCTCGCTGTTACC        |
| <i>AtGA20ox4</i> | GAACATTGGCGACACTTTAATGGC       | TGGTGGCTTCACCACTTTGTCC        |
| <i>AtGA20ox5</i> | AACGTTGGAGACACCTTCATGGC        | ACTGCCCTGTGGTAACAACCTCC       |
| <i>AtActin</i>   | TGGGATGAACCAGAAGGATG           | AAGAATACCTCTCTTGGATTGTGC      |

---
