# Supplementary material for: Genome-Wide Characterization of Chrysanthemum indicum Nuclear Factor Y, Subunit C Gene Family Reveals the Roles of CiNF-YCs in Flowering Regulation
Source: MDPI journal article supplement (doi:10.3390/ijms232112812), 2022-10-24
Supplement: s1 [file s1]

## Supplementary Data S1. The genomic sequences of CiNF-YC

### >CiNF-YC1

TACACCCCACTTCACCTTATCCTCTCCCAAAACACATGCATTCTATTCTTATTTCTACAATCCATCACTTATTATT  
CATATTGGCCTTAACATAACAACCACAAACAACCTTAACAACCACAAACAACAACAATGGACAACAACACA  
ACACCAACAACAGCCACCCCAACCACCCCTCCGCCACCACCTTACCAACATCTCCTCCAACAACAACACCAA  
CAGCTCCAAATGTTTTGGAACCTACCAACGTCAAGAAATCGAACAAGTTAATGATTTCAAAAACCATCAACTC  
CCTTTAGCACGTATTA AAAAGATCATGAAAGCCGACGAAGACGTTTCGCATGATTTAGCCGAGGCACCTAT  
CTTGTTTGC GAAAGCATGCGAGTTATTATTCTTGAGTTAACTATACGTTTCATGGCTGCATGCAGAAGAAAA  
TAAACGTAGAACATTGCAAAAAAATGATATTGCAGCTGCTATTACACGTACGGACATATTTGATTTCCCTTGT  
GGATATTGTTCCACGTGACGAGATTAAGGATGATGTTGGTGTGGTGTGGTGTGGGGGGATGGTAGGGT  
CTAATACGGCTAGTGGGATGCCGTATTATTATCCTCCCATGGGACAACCGGCCGCTGGGATGGGTGGGGTG  
ACCATGGGACGGCCGGCTGTGGATCCCACGGGAATGTATGGTCCCCGTCTCAAGCGTGGCAGTCAGTGTG  
GCAGACCGGGGATGATGGGTCA TTTGGGAGTGGCGGGAGTGGTGGACATGGAGGTATCGATGGCCAGGGG  
TAAAGGCCTATTCTTGATTTCGGGCCAATGAGTTCGATATATCAGGGAGGGGCGGGGCGGCGTAGAAGTAGCAGC  
TGCCTGCTGGTGAAGATCAGATTGCTCATGGAGTAATTCCTGCAAATTATGATATGAAGTTGGAGTTGCTATACAT  
AGTGTAATCAG

### >CiNF-YC2

AGTTGTATAAACATAACCCAGAACCAATTACATAAATATCGAGCAAGATGGATCCACA  
AGGGCACGGGCAGCCCCAAGGTAGCCACATCATGACCAATGTACCTCAGTTACCA  
TATGCAACAAACCCATATGATCAAACCCAAATAAGTGGCACCCCTGGCAGAGGAC  
CAATAGTACCACCAGGTGGAGCTGCCCTTCAAGCCGCTACTCAGCCCCTGTCAG  
CGCAATTAGCACAACAACAATGGCTTATCATCAGATACAACAACAACAGCAGCA  
GCAACTTCAGCAACAACCTCCAGTCATTTTGGGCAAACCAGTATCGAGAAATAGAA  
AACGTCAATGATTTCAAGAACCATAGCCTTCCATTAGCAAGAATTAAGAAGATCAT  
GAAGGCTGACGAGGACGTAAGAATGATATCAGCTGAAGCACCTATTGTGTTTGCA  
AGAGCATGTGAGATGTTTCATATTGGAGTTGACTCTACGGTCATGGAATCATACTG  
AAGAAAACAAAAGGAGGACACTGCAAAAAAACGACATTGCTGCTGCAATCACGA  
GGACTGAAATATTTGACTTTTTTGGTTGATATAGTTCCGAGGGAGGATATAAAGAA  
GAAGTTATGACATCTATGCCAACGGTGAATGTGCCGGTTGGTGGGCCTTCTGATA  
CGTTCCCTTATTATTACATGGCACCTCAGCATTACCGCAGTCCGGAGCACCAGG  
GATGATTTCAAACAAGCCTATGATGGATCCTGGTCTTTATGCACAGCAGCCTCCG  
CCATATATGGGTCCAGCAATGTGGCCACAGCCACCTCAGCAGCCACAGTCACCTT  
CGGATTCATAGATGCTATAGCCTATTCCTTCTTTGCAAATTTTGGAACTGCTTTGAATCT  
ATAATCTGCGTTTGACTCAACTAGGAGTTTATCCGGAACGGGTGGTGTGGATATCTCA  
TGTTAAGTCCTGGTTC

### >CiNF-YC3

TTTGAGGTACAGCATTTTCACCCAATTTCCAATCAAACCCTAACCCCTAAAAAGCTACTGAAATCATCATCAAGTTC

TTGATTAAATTTTTTGCTCTGGTTCTCAGTTTGATTCAAACATATTAGTTCTTCAAAGGTGTGAGCGTTATTAAGAT  
GGATCAGCAAGGGCATGGATCAGCAAGGGCATGGGCAAGCCTCAGGTATGGGGGCTGTTGGTAGCTCTGCT  
CAGATGCCTTACAATATGGCACCTATCCTCCAAACCAATGATGGGGATTGTACCCCTGCATCAGTTGGA  
GGGTGGTCCCACCTTCACAAACATCTGGTCTTACGTCTCCACCAGCACAGCTTGCAACAACAGCAACTCGCT  
TATCAGCACATTACCAGCAACAGCAACAACAGTTGCATCAACAACCTGCAAAATTTCTGGGCAAACAGTAC  
CAAGAAATCGAGCAAACCACTGATTTCAAGAACCATAGTTTACCCCTGGCTAGAATCAAGAAAATCATGAAA  
GCAGATGAGGATGTACGAATGATATCTGCTGAAGCACCCGTCATATTTGCTCGTGCATGTGAAATGTTTCATC  
CTTGAGTTGACTTTAAGGTCTTGGAATCATACTGAAGAGAACAAAAGGAGGACACTTCAGAAAAACGACAT  
TGCTGCTGCAATCACAAGGACTGATATCTTTGACTTCTTAGTTGATATTGTACCAAGAGAGGATCTGAAAGA  
TGAAATTATTGCTTCTACTGTCCCAAGAGGGCGGACCCTTCCAGTTGGAGCTCCAACCGAGGGTCTTCCGTA  
TTACTATATGCCTCCTCCACAAGTTGGTGCTTCAGGGATGTATATGGGTAAGCCTGTGGATCCTCAAGCTCT  
TTATGGACAGCAGCCTCGTCCATACATGGCTCAGCCTATGTGGCCACAACAGCAACAACAAGAACCACA.GG  
AAGATGCTTAAACAGGACGTTTACAAGGGATCAAATCCTGAAGATGGTGGCTGTAGACGAGTACTCACTTCTGGC  
ATTTGTATCAAGGTTCAATTTGCATTGGTTATTAGGAATGCTTGTAGTCATACTTAACTATGTATTTCTGTCTACTT  
GCTGTTAATGATGTTGGCGGCGAACGTGTGTTATATCTAGACCTGGTCTTGAAAACCTTAACTCATATCCAATG  
CAAAAGGTATGGTGATTGCTCTTTCGATGGCAATAAATTAGCCAACACACAACCTTTGAGTGCTAAAGCCTCGAGT  
CTACTCG

**>CiNF-YC4**

ACAGATACTTTTTTTTCTTCTAGGGTTTAATCGAAGTAATTTAAAAGTTTTAAGAGAATT  
TGTTGGAAATATCTAAACATGGATCAACAAGACCAGGGGCAGTCACAGAACATGGG  
AACAGCTGGTAGCTCAGCTCAGATGCAATATGGTGTAAGCCCATATCCACAAAAC  
CAGATGATGGGCTCCGGGCCCCCAGGTCAGGCTCAACAATCGGTGGGTCTTCCT  
TCACCTCCAGGACAGCTTGCAACAACAGCAACTTGCTTATCAGCACATTCATCAGC  
AACAACAGCAGCAACTGCATCAACAACCTTCAGAATTTTTGGGCGAATCAGTACCA  
AGAAATCGAGCAGACAACCTGATTTTAAAAACCATAGTCTACCATTGGCAAGGATA  
AAAAAGATCATGAAGGCAGACGAGGATGTGAGGATGATATCAGCTGAAGCCCCCT  
GTCATATTTGCTCGTGCATGTGAAATGTTTATACTAGAGTTGACTTTAAGGTCATG  
GAATCATACTGAAGAGAATAAACGAAGAACTTCAGAAAAACGACATTGCAGCT  
GCAATCACGAGGACTGATATTTTCGACTTTCTAGTTGATATTGTACCAAGGGAGGA  
TTTAAAAGATGAGGTGCTCGCATCAACGATGCCTAGAGGTGGGCCTCTCCCAGTT  
GGCGGCCCAACTGAGGGTCTCCCTTACTATTACATGCCTCCGCCACAAGTTGGTG  
GTTCAGGGATGTATATGGGTAAGCCCGTTGATCCTCAAGCTCTTTATGGACAGCA  
GCCTAATCCATATATGGCTCAGCCTCTTTGGCCACAACAGCAGCAACAAGAACCG  
CAGGGTGATGCTTAGGGCAGGGACCTAAAAG.AAGCTTTAGGTAATGTAACAATAGG  
GATGTATCAAGCTACAAAAGATCATACTATGGTTGTAATATCTTGAAGACACTCGGTGTA  
TGCTCAATGATGTTATACGACG

**>CiNF-YC5**

AGTTTGTTTATGTCTCATCATGTTGATCTTATTAATATATTCTTCATTACATCATCTTCTCT  
CTTAAAATCTTTTGAAAAATAAGCTTTTATGATTTTTGCCCTAGAAATACATGCTTCTTT

GTTCATGAAATATTGATACTAGTGACTTTAGTATAGAACAAAAGTTTTCTTTGAAACCA  
TCAATTGTTTCTTGAACCATCGATTCAAGACTATTTTCGTTTTCTTTTATATTTGAGATGAG  
GCAAGCCGGGGCGTATTCAGGAATTTTATCAGGAGGAGGGATATCGGGGCGAAC  
TGGACCCCATTTGTTGCCATTAGCAAGGATCAAGAAGATCATGAAGAAATCAAGT  
GTGGATGTGAAGATGATCTCAGGAGAGGCACCACTTGTGTTCTCAAAAGCTTGT  
GAGCTTTTCATTGAGGAATTGACTAAGAGATCATGGAACATGACAATTCAAGGCA  
AGAGAAGAACTTTGCACAAAGAAGATGTTGCATCCGCGGTTGCAACGACTGATG  
TCTTTGATTTTCTTATCGACTTGGTTCATCCTAATGTTTCTGAAGATGTTGATTTG  
AATGATGAAGAAACCCTTGAAAAGTAACTTGAACGCGCGAGCCATGCATTGTTGTTA  
ATGAAGTGATTAAACTTGTTTAACTATGAATATCTCAAAGTCTTGGGATCATATCTTTA  
ATTAATCGTGGAATGTTGGTTGAATAATTAATA
