# Supplementary material for: Genome-Wide Characterization of Chrysanthemum indicum Nuclear Factor Y, Subunit C Gene Family Reveals the Roles of CiNF-YCs in Flowering Regulation
Source: Int J Mol Sci. 2022 Oct 24;23(21):12812. doi: 10.3390/ijms232112812 (PMC9654237; doi:10.3390/ijms232112812)
Supplement: Supplementary file 1 [file ijms-23-12812-s001.zip]

Archive with 5 entries (5 files):
- Supplemental Table S1. Primers used for gene isolation, vector construction and RT-qPCR analysis.pdf
- supplementary data S1.genomic sequences of CiNF-YCs .pdf
- Supplementary Figure S1. The alignment of conserved domain of AtNF-YCs and CiNF-YCs..pdf
- Supplementary Figure S2. The alignment of conserved domain of CmNF-YCs and CiNF-YCs..pdf
- Supplementary Figure S3. The conserved motifs of CiNF-YCs..pdf
