# Supplementary figures and images for: Genome-Wide Characterization of Chrysanthemum indicum Nuclear Factor Y, Subunit C Gene Family Reveals the Roles of CiNF-YCs in Flowering Regulation
Source: MDPI journal article supplement (doi:10.3390/ijms232112812), 2022-10-24

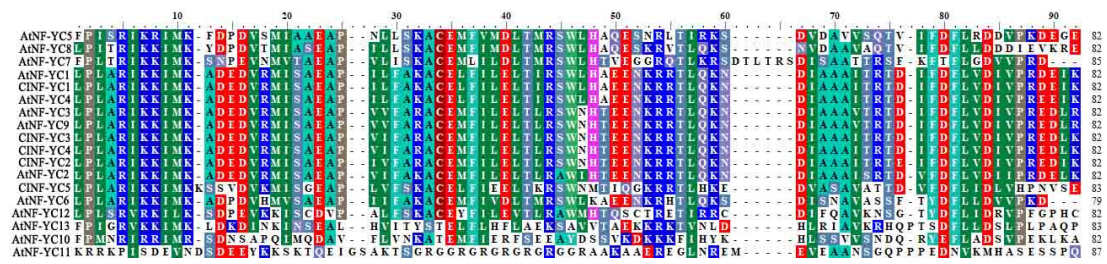

Supplementary Figure S1. The alignment of conserved domain of AtNF-YCs and CiNF-YCs.

Supplement: s1 [file s1]

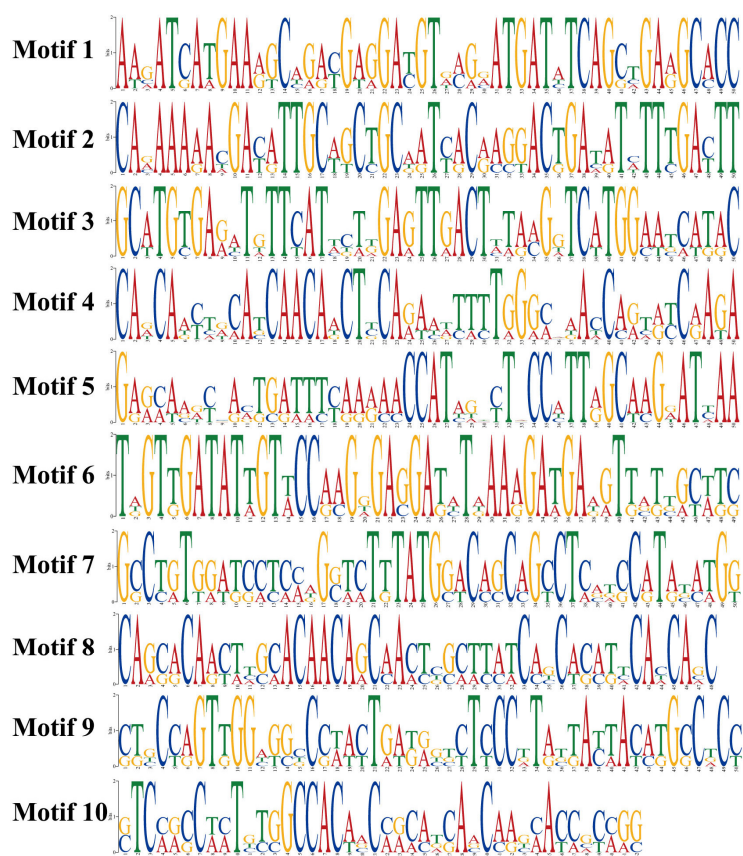

Supplementary Figure S3. The conserved motifs of CiNF-YCs.

Supplement: s1 [file s1]

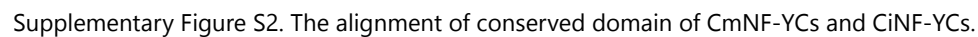

Supplementary Figure S2. The alignment of conserved domain of CmNF-YCs and CiNF-YCs.

Supplement: s1 [file s1]
